# Supplementary material for: An Exploration of the help-seeking experiences of patients in an allied professions-led rapid access chest pain pathway: a qualitative study
Source: HighWire-hosted journal article supplement (doi:10.1136/bmjopen-2020-040468), 2020-11-01
Supplement: bmjopen-2020-040468supp001_data_supplement.pdf [file bmjopen-2020-040468supp001_data_supplement.pdf]

## Supplementary File 1: Interview Guide

| Topic              | Question                                                                                 | Probes                                                                                                                                                                                            |
|--------------------|------------------------------------------------------------------------------------------|---------------------------------------------------------------------------------------------------------------------------------------------------------------------------------------------------|
| Symptoms           | Can you tell me something about the symptoms the led you to see a doctor?                | Feeling / experience?<br>Most noticeable symptoms?<br>Actions at the time of symptoms<br>Action in the symptoms free immediately before?<br>Length?<br>Recognised symptoms?<br>Previous symptoms? |
| Symptoms           | What was it like having those symptoms?                                                  |                                                                                                                                                                                                   |
| Help-seeking       | Tell me what you did about your symptoms                                                 | Family / friends<br>Self-medicated<br>Waited to pass<br>Saw a doctor or other health professional e.g. pharmacist                                                                                 |
| Help-seeing delay  | Did you delay seeing the doctor?                                                         | How long?<br>Why did you delay?                                                                                                                                                                   |
| Help-seeking       | Tell me about when you decided to see a doctor / GP? What were you thinking and feeling? | Waiting time / delays<br>Promoting factors / Barriers<br>Influences (friends / family)<br>Severity of symptoms<br>Previous symptoms                                                               |
| GP experience      | What was the GP like?                                                                    | Difficulty / Easy to get a referral<br>Understanding                                                                                                                                              |
| RACPC experience   | How did you experience that chest pain clinic consultation?                              | Thoughts and feeling<br>Advice / medications<br>Reassure<br>Onwards referrals<br>Further tests<br>Chest pain outcome e.g. thoughts / feelings (appropriate to pre or post assessment)             |
| Coronary Candidacy | What do you understand about people at risk of having heart disease?                     | Personal beliefs<br>Lifestyle choices<br>Family History                                                                                                                                           |
| Barriers           | How do your day to day pressures affect your ability to see a doctor?                    | Role as mother / father<br>Primary care giver<br>Professional life / breadwinner<br>Domestic duties<br>Other responsibilities (e.g. social club etc).<br>Accessibility of medical services        |
| Help-seeing        | How do you feel in general about asking for help? From doctors?                          |                                                                                                                                                                                                   |
| General            | Can you tell me a bit your background?                                                   | Marital Status<br>Children<br>Profession Live<br>Exercise<br>Diet                                                                                                                                 |
| General            | Can you tell me a little about your health in general?                                   | Underlying non-heart related medical conditions?                                                                                                                                                  |
| General            | What else about your symptoms or experience would you like to tell me?                   |                                                                                                                                                                                                   |
| General            | Anything else we have not covered you would like to say?                                 |                                                                                                                                                                                                   |
