# Supplementary material for: An Exploration of the help-seeking experiences of patients in an allied professions-led rapid access chest pain pathway: a qualitative study
Source: HighWire-hosted journal article supplement (doi:10.1136/bmjopen-2020-040468), 2020-11-01
Supplement: bmjopen-2020-040468supp002_data_supplement.pdf [file bmjopen-2020-040468supp002_data_supplement.pdf]

## Supplement File 2: Development of the Codes

| Initial Codes                                                                                                                | Revision of Codes                                                                                                       | Current Codes         |
|------------------------------------------------------------------------------------------------------------------------------|-------------------------------------------------------------------------------------------------------------------------|-----------------------|
| Cardiac Symptoms<br>Severity of Symptoms<br>Types of Symptoms<br>Thoughts about the Symptoms<br>Approach to symptoms<br>Pain | Approach to symptoms<br>Severity of symptoms<br>Types of Symptoms<br>Interpretation of symptoms                         | Symptoms              |
| Compartmentalising                                                                                                           | Feeling and Emotions                                                                                                    | Feeling and Emotions  |
| Age profile for heart disease                                                                                                | Age                                                                                                                     | Age                   |
| Lifestyle factors<br>Risk Factors for                                                                                        | Risk Factors                                                                                                            | Risk Factors          |
| Doctor Consultation<br>Nurse Consultation                                                                                    | Doctor Consultation<br>Nurse consultation                                                                               | Consultations         |
| Procedural complications<br>Procedures                                                                                       | Test and Treatments<br>Procedural complications<br>Procedures                                                           | Test and Treatments   |
| Non-Cardiac Conditions                                                                                                       | Other conditions<br>Co-morbidity                                                                                        | General Health        |
| Physical Activity<br>Non-physical Activity                                                                                   | Activity                                                                                                                | Activity<br>Exercise  |
| Gender Issues                                                                                                                | Gender Issues<br>Social Role evolution                                                                                  | Gender                |
| Behaviours<br>Beliefs<br>Denial<br>Culture                                                                                   | Belief and Behaviours<br>Denial<br>Trivialising of symptoms<br>Concealing symptoms<br>Being judged<br>Coping<br>Culture | Behaviours<br>Beliefs |
| Motivators                                                                                                                   | Motivators<br>Breadwinners                                                                                              | Motivations           |
| Help-seeking<br>Barriers to help-seeking<br>Facilitators to help-seeking<br>Delay                                            | Help-seeking                                                                                                            | Help-seeking<br>Delay |
| Family                                                                                                                       | Family                                                                                                                  | Family                |
| Friends                                                                                                                      | Friends                                                                                                                 | Friends               |
| Attitude to self<br>Thoughts                                                                                                 | Attitude to self<br>Self-talk<br>Thoughts<br>Misconceptions of heart disease                                            | Thoughts              |
| Avoidance of people when unwell                                                                                              | Avoidance of people when unwell                                                                                         | Behaviours            |
| Timing                                                                                                                       | Timeliness                                                                                                              | Time                  |
| Previous medical experience                                                                                                  | Health Knowledge                                                                                                        | Health Knowledge      |
| Diagnosis                                                                                                                    | Diagnosis                                                                                                               | Diagnosis             |
| Social Activity<br>Profession                                                                                                | Social Activity<br>Profession<br>Professional Disappointments                                                           | Occupations           |
| Mental health                                                                                                                | Mental health<br>Psychology                                                                                             | Mental health         |
| Media                                                                                                                        | Media                                                                                                                   | Media                 |
| Partners                                                                                                                     | Partners                                                                                                                | Partners              |
| Referrals<br>Access to medical services                                                                                      | Accessibility                                                                                                           | Accessibility         |
|                                                                                                                              | Physical Limitations<br>Daily living limitations                                                                        | Limitations           |
|                                                                                                                              | Incidental findings                                                                                                     | Help-seeking          |
|                                                                                                                              | Diet                                                                                                                    | Diet                  |
|                                                                                                                              | Anti-help-seeking                                                                                                       | Help-seeking          |
|                                                                                                                              | Deference to doctors<br>Doctor consultation                                                                             | Doctors               |
|                                                                                                                              | Nurses<br>Cardiac Scientists                                                                                            | Health Professionals  |
|                                                                                                                              | Culture                                                                                                                 | Culture               |
|                                                                                                                              | Stress                                                                                                                  | Stress                |
|                                                                                                                              |                                                                                                                         | Severity              |
|                                                                                                                              |                                                                                                                         | Duration              |
|                                                                                                                              |                                                                                                                         | Frequency             |
|                                                                                                                              |                                                                                                                         | Barriers              |

|                                         |                       |                |
|-----------------------------------------|-----------------------|----------------|
|                                         |                       | Women          |
|                                         |                       | Men            |
|                                         |                       | Pre (outcome)  |
|                                         |                       | Post (outcome) |
| Identity issues                         | Identity issues       | <i>Deleted</i> |
| Hospitals                               | Hospital              | <i>Deleted</i> |
| The future                              | <i>Deleted</i>        |                |
| Positive Effect of a cardiac experience | <i>Deleted</i>        |                |
| Chest Pain Clinic experience            | Chest pain experience | <i>Deleted</i> |
| Escapism                                | <i>Deleted</i>        |                |
